# Supplementary material for: Genome-wide identification and characterisation of R2R3-MYB genes in sugar beet (Beta vulgaris)
Source: PubMed Central journal article supplement (PMC4180131; doi:10.1186/s12870-014-0249-8), 2014-09-25
Supplement: 12870_2014_249_MOESM2_ESM.pdf [file 12870_2014_249_MOESM2_ESM.pdf]

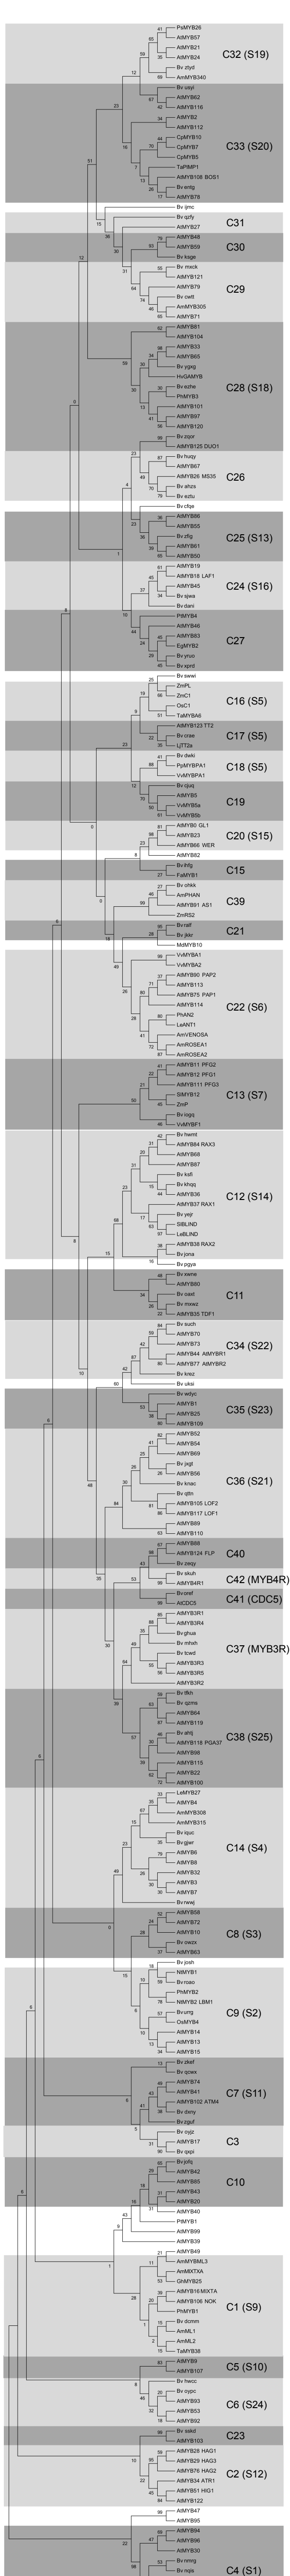

**Additional File 2. Phylogenetic Maximal Parsimony (MP) tree (1000 bootstraps) with MYB proteins from *Beta vulgaris* (*Bv*), *Arabidopsis thaliana* (*At*) and other plants.**

Bootstrap measures are given at the branches.
